# Supplementary material for: Transfer of 7 Organic UV Filters from Sediment to the Ragworm Hediste diversicolor: Bioaccumulation of Benzophenone-3 and Further Proof of Octocrylene Metabolism
Source: MDPI journal article supplement (doi:10.3390/pollutants2010004), 2022-02-04
Supplement: s1 [file s1]

## Supporting information for:

# First results of transfer of 8 organic UV filters from sediment to the common ragworm *Hediste diversicolor*: bioaccumulation of benzophenone-3 and further proof of octocrylene metabolism

Fanny Clergeaud<sup>1</sup>, Sonja K. Fagervold<sup>1</sup>, Clémence Rohée<sup>2</sup>, Alice M. S. Rodrigues<sup>1</sup>, Evane Thorel<sup>1</sup>, Didier Stien<sup>1</sup>, Philippe Lebaron<sup>1</sup>

<sup>1</sup>Sorbonne Université, CNRS, Laboratoire de Biodiversité et Biotechnologies Microbiennes, USR3579, Observatoire Océanologique, 66650, Banyuls-sur-mer, France.

<sup>2</sup>Pierre Fabre Dermo-Cosmétique, Centre de Recherche & Développement Pierre Fabre, 31000 Toulouse, France

## Table of content

|                                                                                                                                                                             |    |
|-----------------------------------------------------------------------------------------------------------------------------------------------------------------------------|----|
| <b>Table S1.</b> List of OC metabolites                                                                                                                                     | 2  |
| <b>Figure S1.</b> Extracted ion chromatograms for compounds <b>1</b> to <b>11</b> ([M+Na] <sup>+</sup> ) in the profile of worms <i>Hediste diversicolor</i> exposed to OC. | 3  |
| <b>Figure S2.</b> MS spectrum of compound <b>1</b>                                                                                                                          | 4  |
| <b>Figure S3.</b> Expanded MS spectrum of compound <b>1</b>                                                                                                                 | 4  |
| <b>Figure S4.</b> MS/MS spectrum of ion at <i>m/z</i> 638.4180 [(1+Na) <sup>+</sup> ]                                                                                       | 5  |
| <b>Figure S5.</b> MS spectrum of compound <b>2</b>                                                                                                                          | 5  |
| <b>Figure S6.</b> Expanded MS spectrum of compound <b>2</b>                                                                                                                 | 6  |
| <b>Figure S7.</b> MS/MS spectrum of ion at <i>m/z</i> 666.4498 [(2+Na) <sup>+</sup> ]                                                                                       | 6  |
| <b>Figure S8.</b> MS spectrum of compound <b>3</b>                                                                                                                          | 7  |
| <b>Figure S9.</b> Expanded MS spectrum of compound <b>3</b>                                                                                                                 | 7  |
| <b>Figure S10.</b> MS/MS spectrum of ion at <i>m/z</i> 664.4336 [(3+Na) <sup>+</sup> ] and [(4+Na) <sup>+</sup> ]                                                           | 8  |
| <b>Figure S11.</b> MS spectrum of compound <b>4</b>                                                                                                                         | 8  |
| <b>Figure S12.</b> Expanded MS spectrum of compound <b>4</b>                                                                                                                | 9  |
| <b>Figure S13.</b> MS spectrum of compound <b>5</b>                                                                                                                         | 9  |
| <b>Figure S14.</b> Expanded MS spectrum of compound <b>5</b>                                                                                                                | 10 |
| <b>Figure S15.</b> MS/MS spectrum of ion at <i>m/z</i> 692.4654 [(5+Na) <sup>+</sup> ]                                                                                      | 10 |
| <b>Figure S16.</b> MS/MS spectrum of ion at <i>m/z</i> 687.5099 [(5+NH <sub>4</sub> ) <sup>+</sup> ]                                                                        | 11 |
| <b>Figure S17.</b> MS spectrum of compound <b>6</b>                                                                                                                         | 11 |
| <b>Figure S18.</b> Expanded MS spectrum of compound <b>6</b>                                                                                                                | 12 |
| <b>Figure S19.</b> MS/MS spectrum of ion at <i>m/z</i> 690.4498 [(6+Na) <sup>+</sup> ]                                                                                      | 12 |
| <b>Figure S20.</b> MS spectrum of compound <b>7</b>                                                                                                                         | 13 |
| <b>Figure S21.</b> Expanded MS spectrum of compound <b>7</b>                                                                                                                | 13 |
| <b>Figure S22.</b> MS spectrum of compound <b>8</b>                                                                                                                         | 14 |
| <b>Figure S23.</b> Expanded MS spectrum of compound <b>8</b>                                                                                                                | 14 |
| <b>Figure S24.</b> MS/MS spectrum of ion at <i>m/z</i> 688.4336 [(8+Na) <sup>+</sup> ]                                                                                      | 15 |
| <b>Figure S25.</b> MS spectrum of compound <b>9</b>                                                                                                                         | 15 |
| <b>Figure S26.</b> Expanded MS spectrum of compound <b>9</b>                                                                                                                | 16 |
| <b>Figure S27.</b> MS/MS spectrum of ion at <i>m/z</i> 684.4023 [(9+Na) <sup>+</sup> ]                                                                                      | 16 |
| <b>Figure S28.</b> MS spectrum of compound <b>10</b>                                                                                                                        | 17 |
| <b>Figure S29.</b> Expanded MS spectrum of compound <b>10</b>                                                                                                               | 17 |
| <b>Figure S30.</b> MS/MS spectrum of ion at <i>m/z</i> 718.4811 [(10+Na) <sup>+</sup> ]                                                                                     | 18 |
| <b>Figure S31.</b> MS spectrum of compound <b>11</b>                                                                                                                        | 18 |
| <b>Figure S32.</b> Expanded MS spectrum of compound <b>11</b>                                                                                                               | 19 |

**Table S1.** List of OC metabolites

| <b>Cmpd.<br/>#</b> | <b>Acyl<br/>chain</b> | <b>Formula</b>                                   | <b>t<sub>R</sub><br/>(min)</b> | <b>Exp. <i>m/z</i><br/>([M+Na]<sup>+</sup>)</b> | <b>Calcd. <i>m/z</i><br/>([M+Na]<sup>+</sup>)</b> |
|--------------------|-----------------------|--------------------------------------------------|--------------------------------|-------------------------------------------------|---------------------------------------------------|
| <b>1</b>           | C16:0                 | C <sub>40</sub> H <sub>57</sub> O <sub>4</sub> N | 15.44                          | 638.4177                                        | 638.418                                           |
| <b>2</b>           | C18:0                 | C <sub>42</sub> H <sub>61</sub> O <sub>4</sub> N | 16.46                          | 666.45                                          | 666.4498                                          |
| <b>3</b>           | C18:1                 | C <sub>42</sub> H <sub>59</sub> O <sub>4</sub> N | 15.52                          | 664.4338                                        | 664.4336                                          |
| <b>4</b>           | C18:1                 | C <sub>42</sub> H <sub>59</sub> O <sub>4</sub> N | 15.67                          | 664.4330                                        | 664.4336                                          |
| <b>5</b>           | C20:1                 | C <sub>44</sub> H <sub>63</sub> O <sub>4</sub> N | 16.51                          | 692.4647                                        | 692.4654                                          |
| <b>6</b>           | C20:2                 | C <sub>44</sub> H <sub>61</sub> O <sub>4</sub> N | 15.67                          | 690.4496                                        | 690.4498                                          |
| <b>7</b>           | C20:2                 | C <sub>44</sub> H <sub>61</sub> O <sub>4</sub> N | 15.77                          | 690.4495                                        | 690.4498                                          |
| <b>8</b>           | C20:3                 | C <sub>44</sub> H <sub>59</sub> O <sub>4</sub> N | 14.99                          | 688.4339                                        | 688.4336                                          |
| <b>9</b>           | C20:5                 | C <sub>44</sub> H <sub>55</sub> O <sub>4</sub> N | 13.71                          | 684.4025                                        | 684.4023                                          |
| <b>10</b>          | C22:2                 | C <sub>46</sub> H <sub>65</sub> O <sub>4</sub> N | 16.63                          | 718.4806                                        | 718.4811                                          |
| <b>11</b>          | C22:6                 | C <sub>46</sub> H <sub>57</sub> O <sub>4</sub> N | 14.05                          | 710.4181                                        | 710.418                                           |

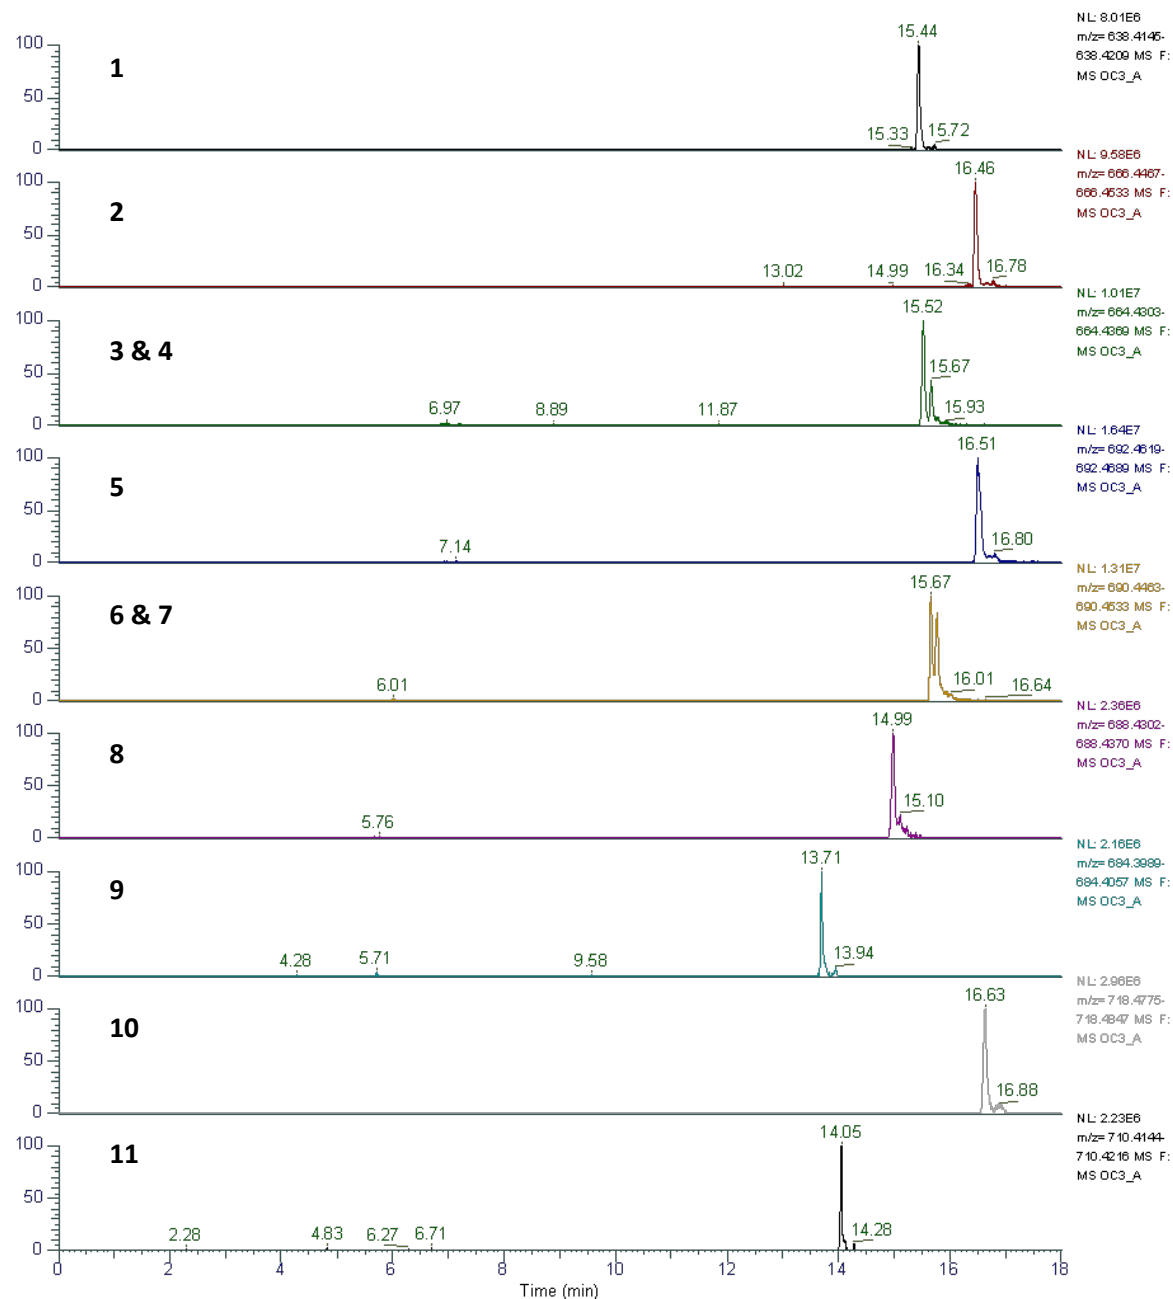

**Figure S1.** Extracted ion chromatograms for compounds **1** to **11** ( $[M+Na]^+$ ) in the profile of worms *Hediste diversicolor* exposed to OC.

OC3\_A #4207-4222 RT: 15.41-15.46 AV: 8 SB: 21 15.56-15.70 NL: 6.36E+007  
T: FTMS + c ESI Full lock ms [133.4000-2000.0000]

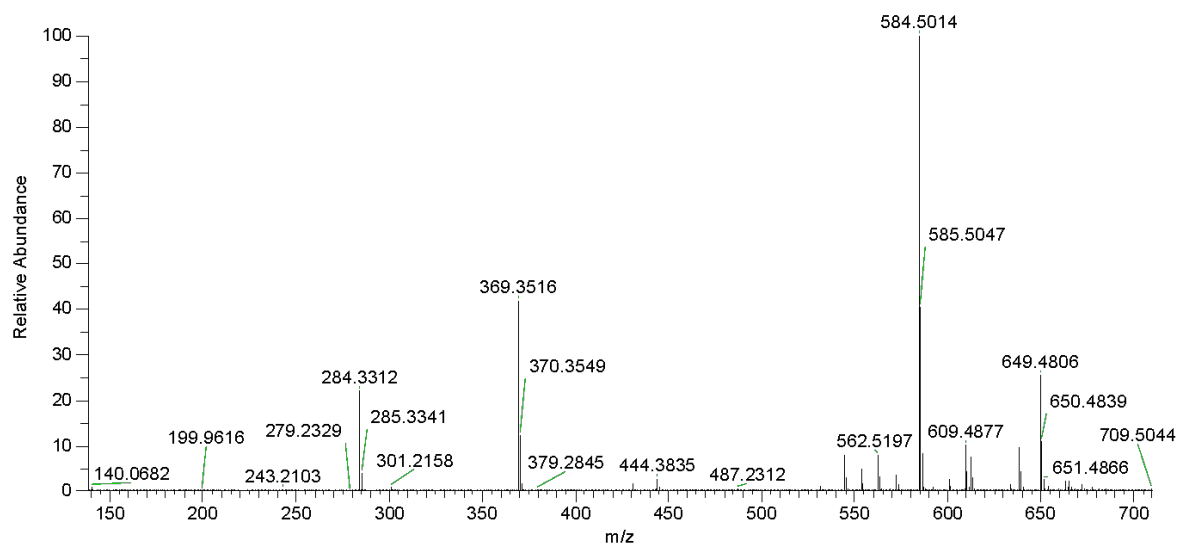

**Figure S2.** MS spectrum of compound 1

OC3\_A #4207-4222 RT: 15.41-15.46 AV: 8 SB: 21 15.56-15.70 NL: 1.62E+007  
T: FTMS + c ESI Full lock ms [133.4000-2000.0000]

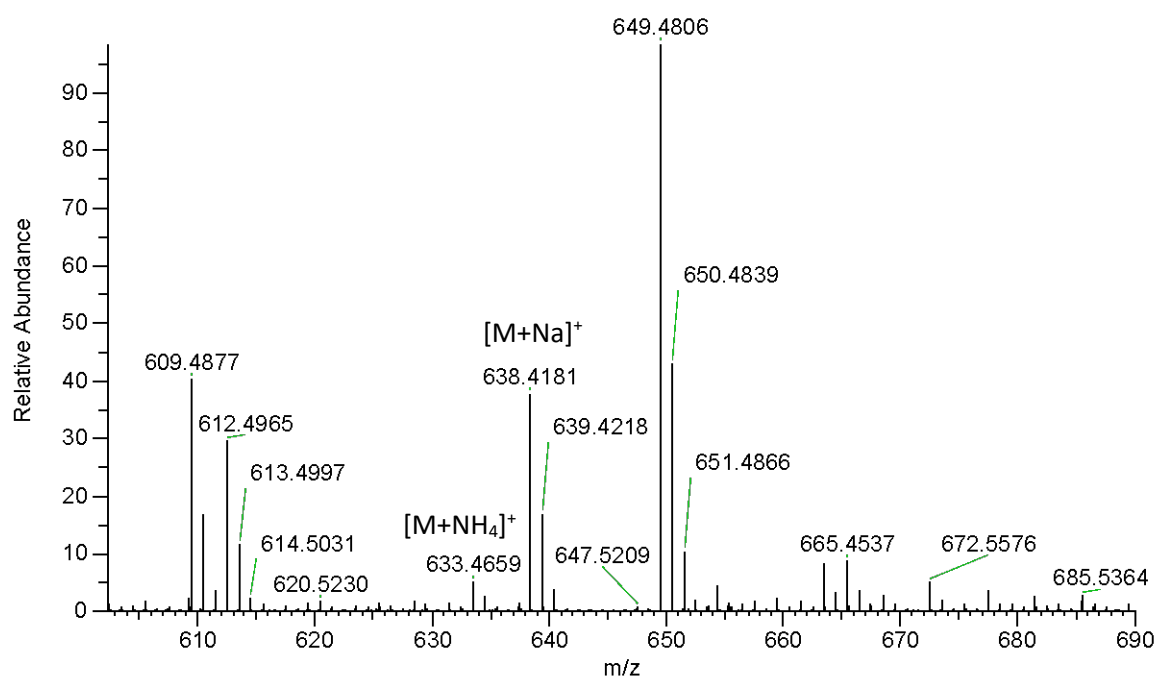

**Figure S3.** Expanded MS spectrum of compound 1

OC3\_A #4210 RT: 15.42 AV: 1 NL: 8.04E+005  
T: FTMS + c ESI d Full ms2 638.4180@hcd30.00 [50.0000-670.0000]

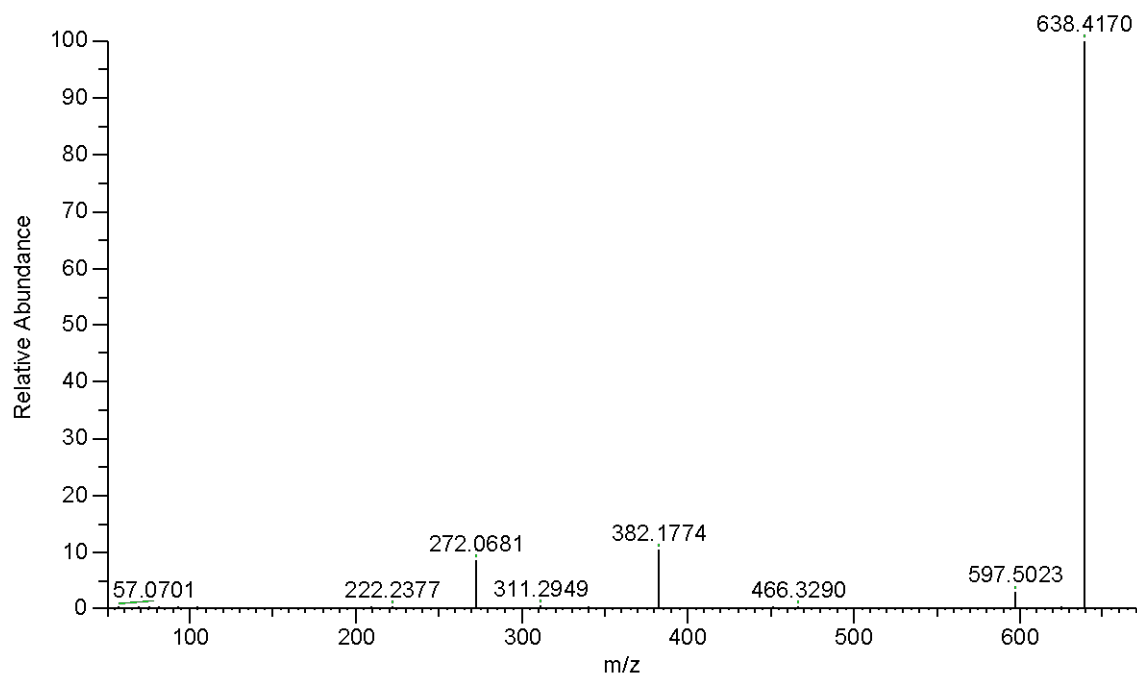

**Figure S4.** MS/MS spectrum of ion at  $m/z$  638.4180  $[(1+Na)^+]$

OC3\_A #4513-4528 RT: 16.44-16.49 AV: 8 SB: 24 16.21-16.37 NL: 7.75E+006  
T: FTMS + c ESI Full lock ms [133.4000-2000.0000]

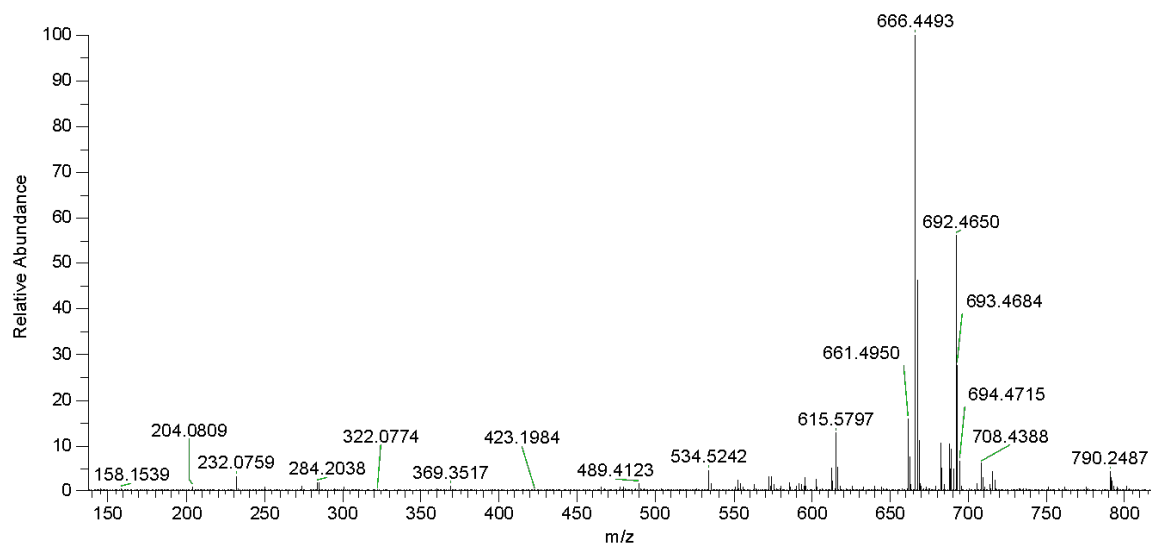

**Figure S5.** MS spectrum of compound **2**

OC3\_A #4513-4528 RT: 16.44-16.49 AV: 8 SB: 24 16.21-16.37 NL: 7.75E+006  
T: FTMS + c ESI Full lock ms [133.4000-2000.0000]

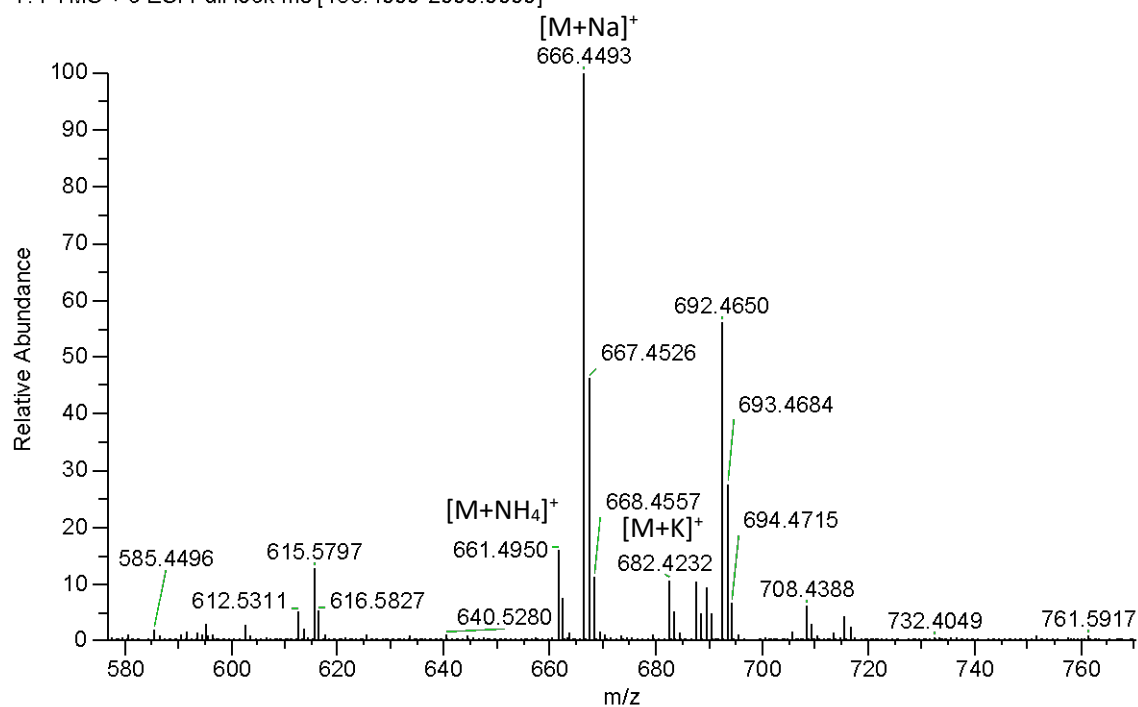

**Figure S6.** Expanded MS spectrum of compound 2

OC3\_A #4514 RT: 16.44 AV: 1 NL: 7.06E+005  
T: FTMS + c ESI d Full ms2 666.4493@hcd30.00 [50.0000-695.0000]

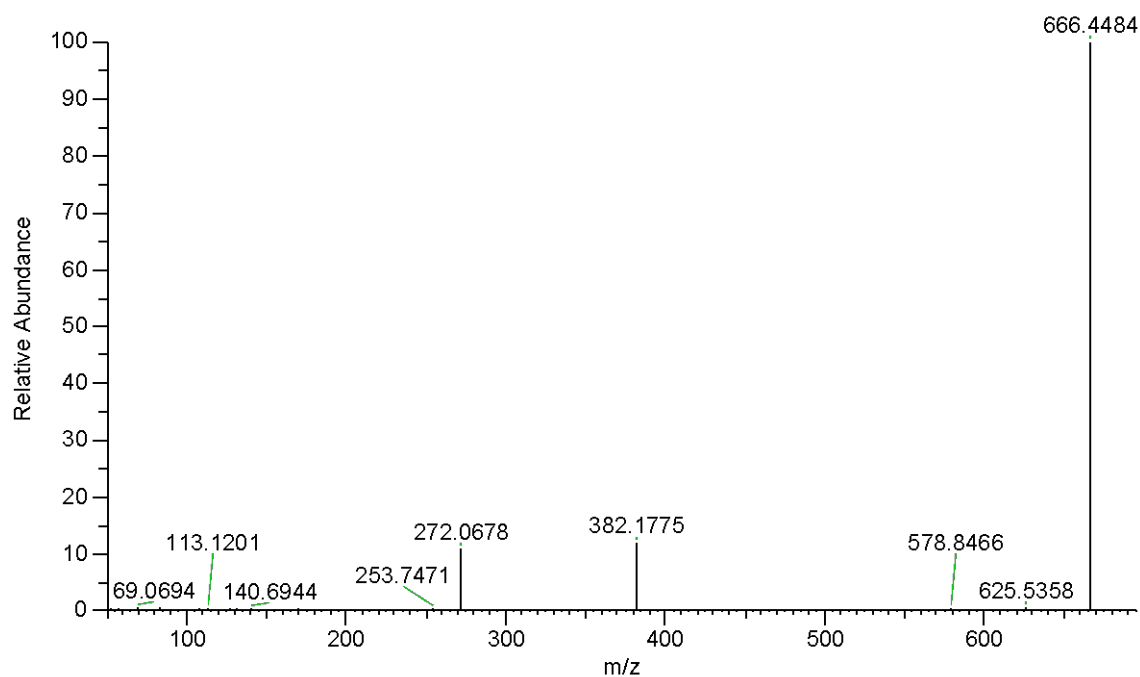

**Figure S7.** MS/MS spectrum of ion at  $m/z$  666.4498  $[(2+Na)^+]$

OC3\_A #4231-4246 RT: 15.49-15.54 AV: 8 SB: 23 15.30-15.45 NL: 7.77E+006  
T: FTMS + c ESI Full lock ms [133.4000-2000.0000]

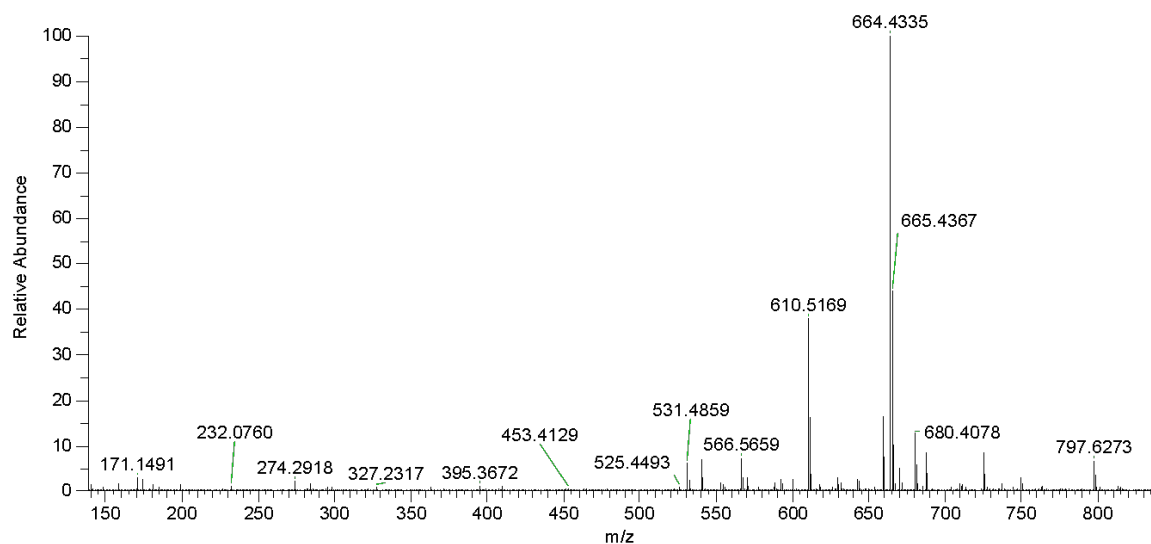

**Figure S8.** MS spectrum of compound 3

OC3\_A #4231-4246 RT: 15.49-15.54 AV: 8 SB: 23 15.30-15.45 NL: 7.77E+006  
T: FTMS + c ESI Full lock ms [133.4000-2000.0000]

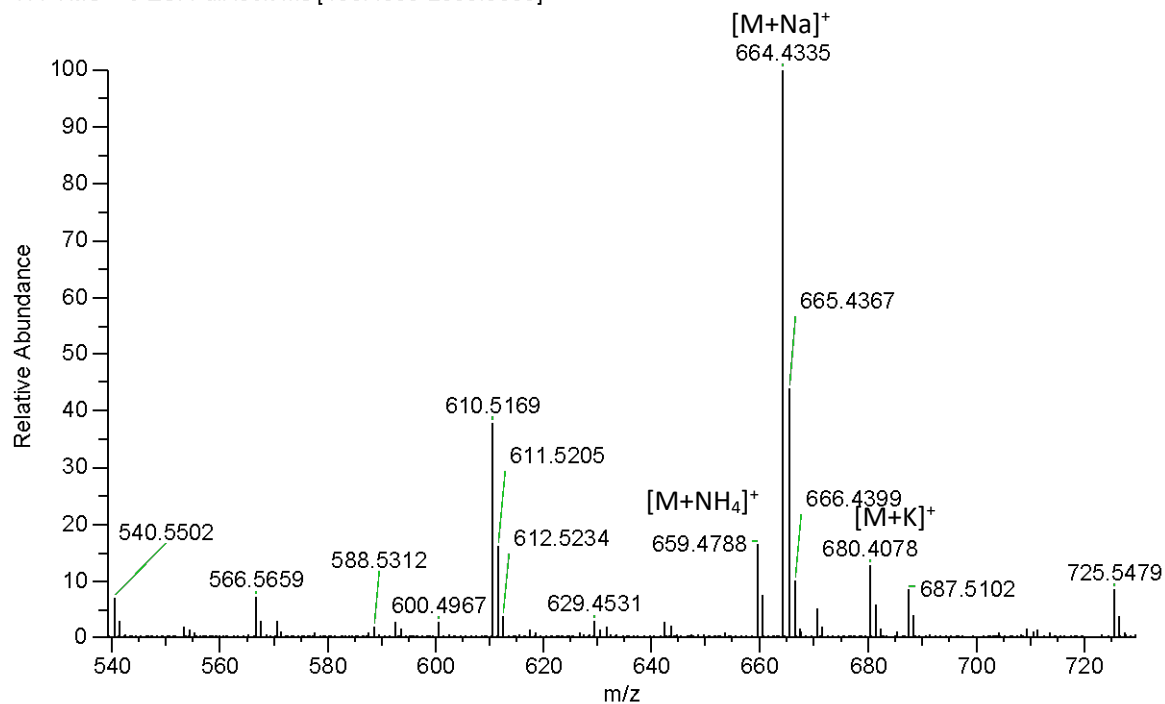

**Figure S9.** Expanded MS spectrum of compound 3

OC3\_A #4236 RT: 15.51 AV: 1 NL: 1.30E+006  
T: FTMS + c ESI d Full ms2 664.4334@hcd30.00 [50.0000-695.0000]

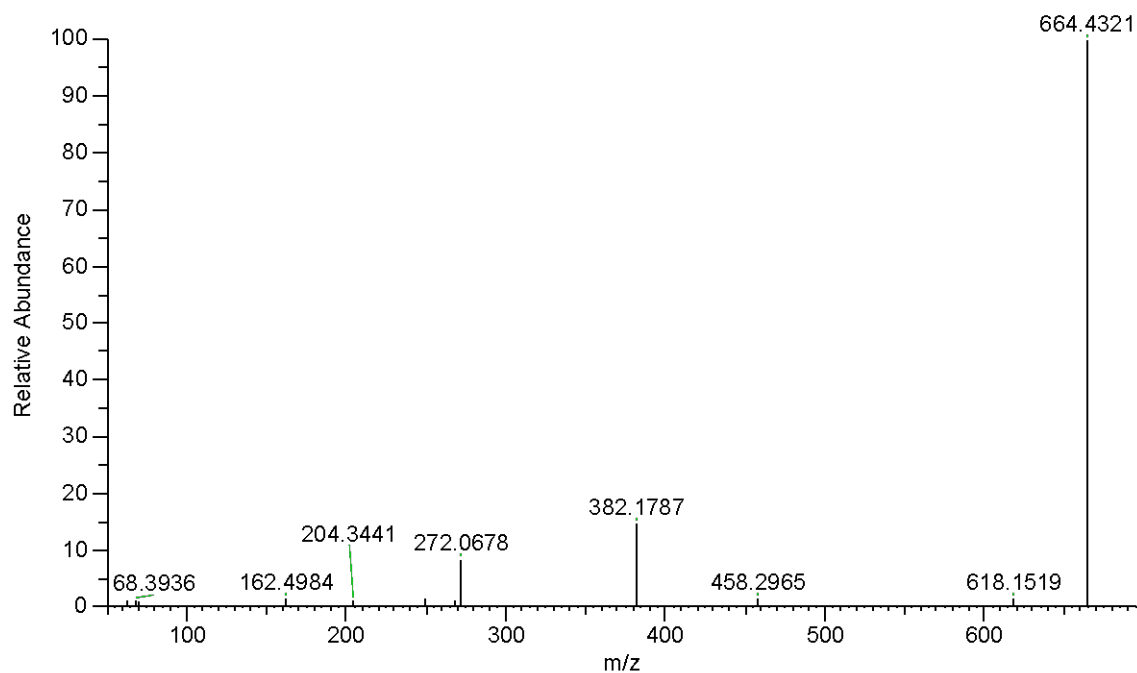

**Figure S10.** MS/MS spectrum of ion at  $m/z$  664.4336  $[(3+Na)^+]$  and  $[(4+Na)^+]$

OC3\_A #4278-4290 RT: 15.65-15.69 AV: 6 SB: 28 15.78-15.96 NL: 2.95E7  
T: FTMS + c ESI Full lock ms [133.4000-2000.0000]

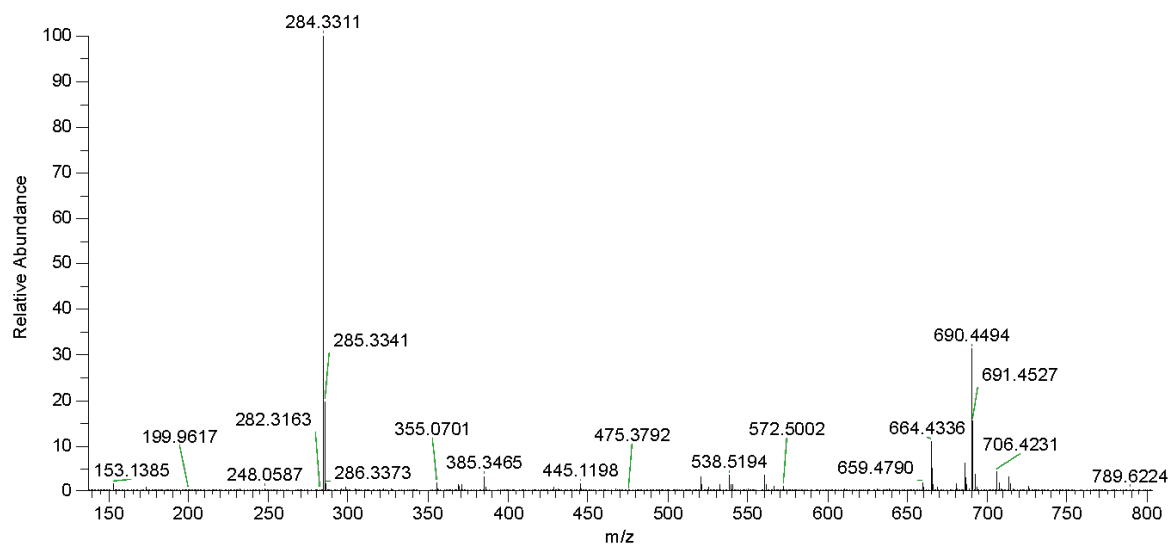

**Figure S11.** MS spectrum of compound 4



OC3\_A #4278-4290 RT: 15.65-15.69 AV: 6 SB: 28 15.78-15.96 NL: 3.23E+006  
T: FTMS + c ESI Full lock ms [133.4000-2000.0000]

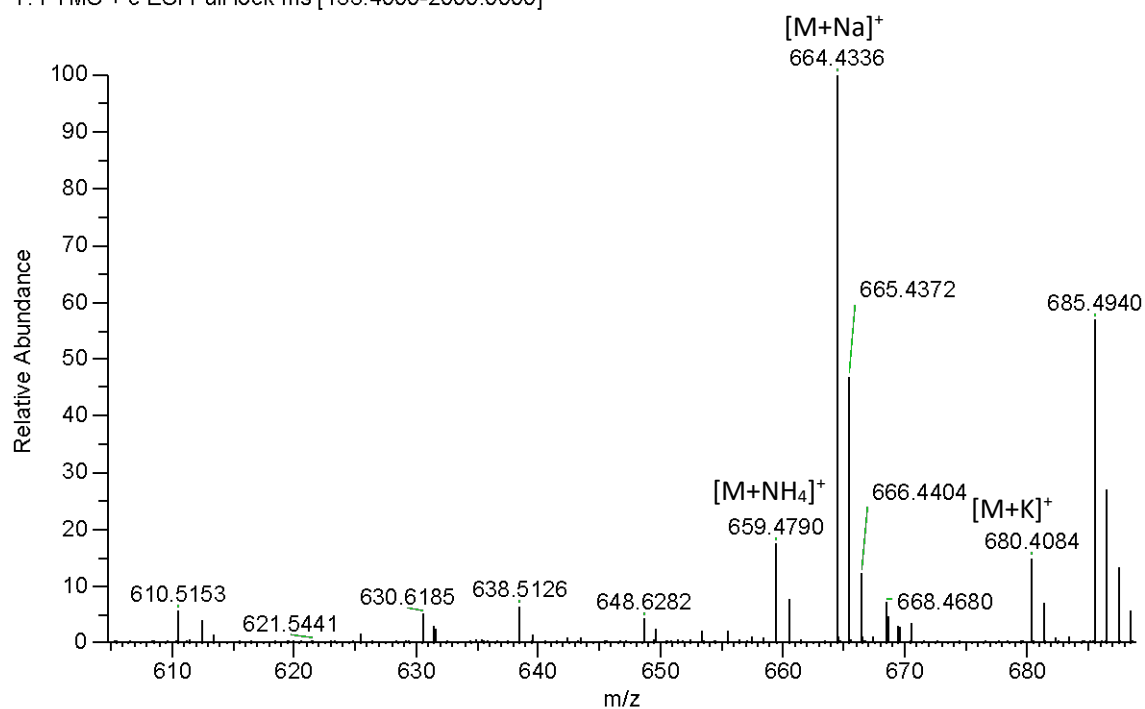

**Figure S12.** Expanded MS spectrum of compound 4

OC3\_A #4522-4552 RT: 16.47-16.57 AV: 15 SB: 12 16.34-16.42 NL: 1.18E+007  
T: FTMS + c ESI Full lock ms [133.4000-2000.0000]

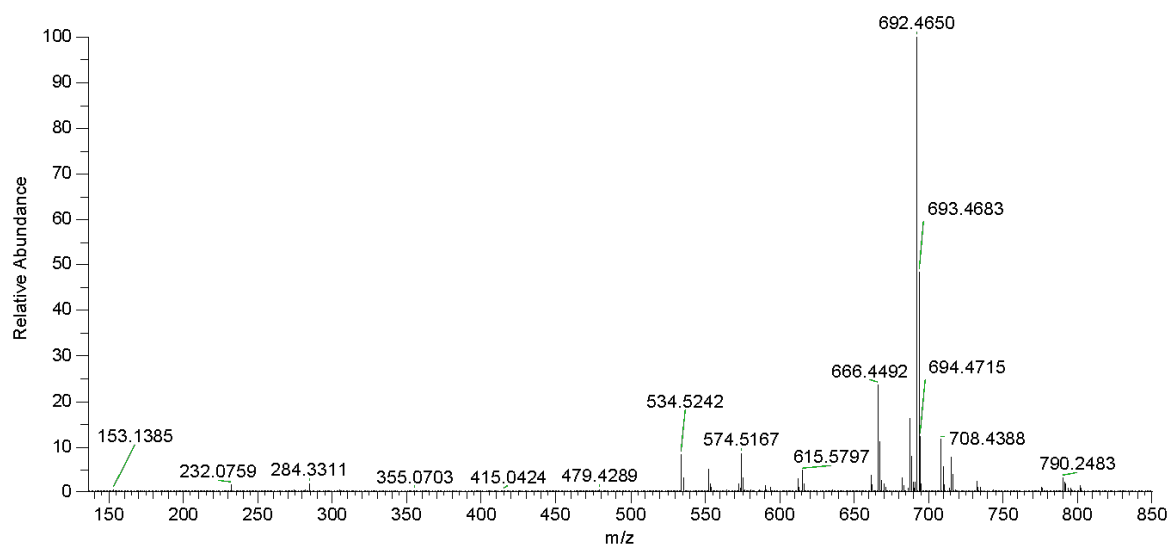

**Figure S13.** MS spectrum of compound 5

OC3\_A #4522-4552 RT: 16.47-16.57 AV: 15 SB: 12 16.34-16.42 NL: 1.18E+007  
T: FTMS + c ESI Full lock ms [133.4000-2000.0000]

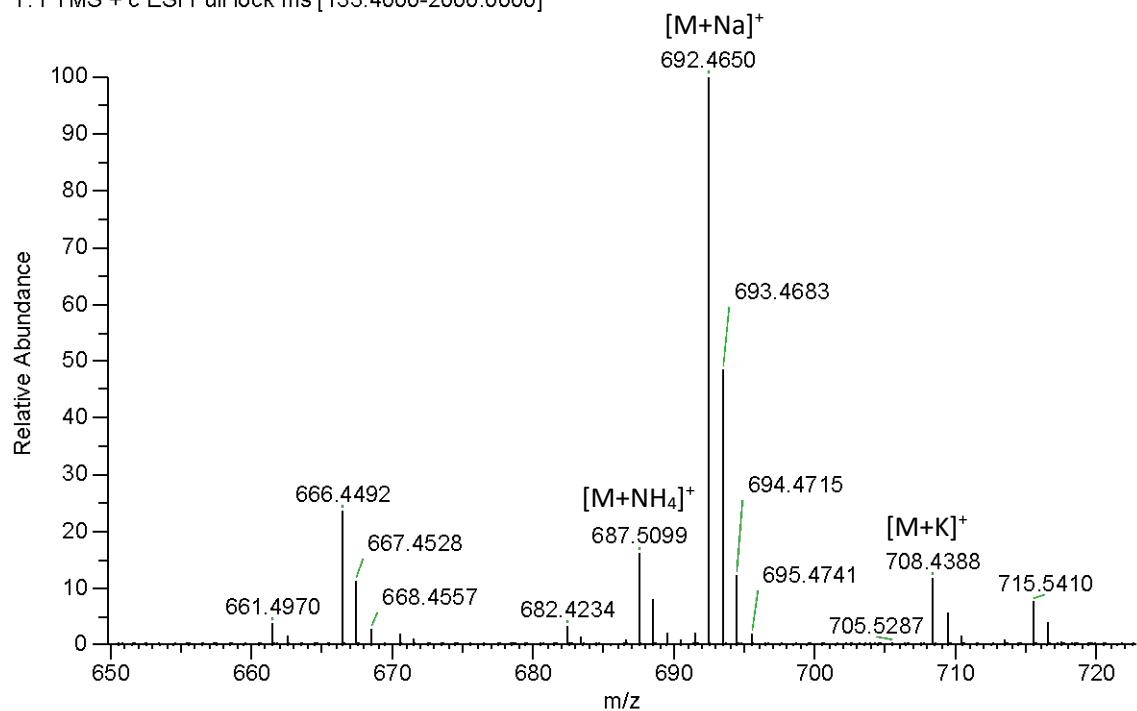

**Figure S14.** Expanded MS spectrum of compound **5**

OC3\_A #4522 RT: 16.47 AV: 1 NL: 6.10E+005  
T: FTMS + c ESI d Full ms2 692.4650@hcd30.00 [50.0000-725.0000]

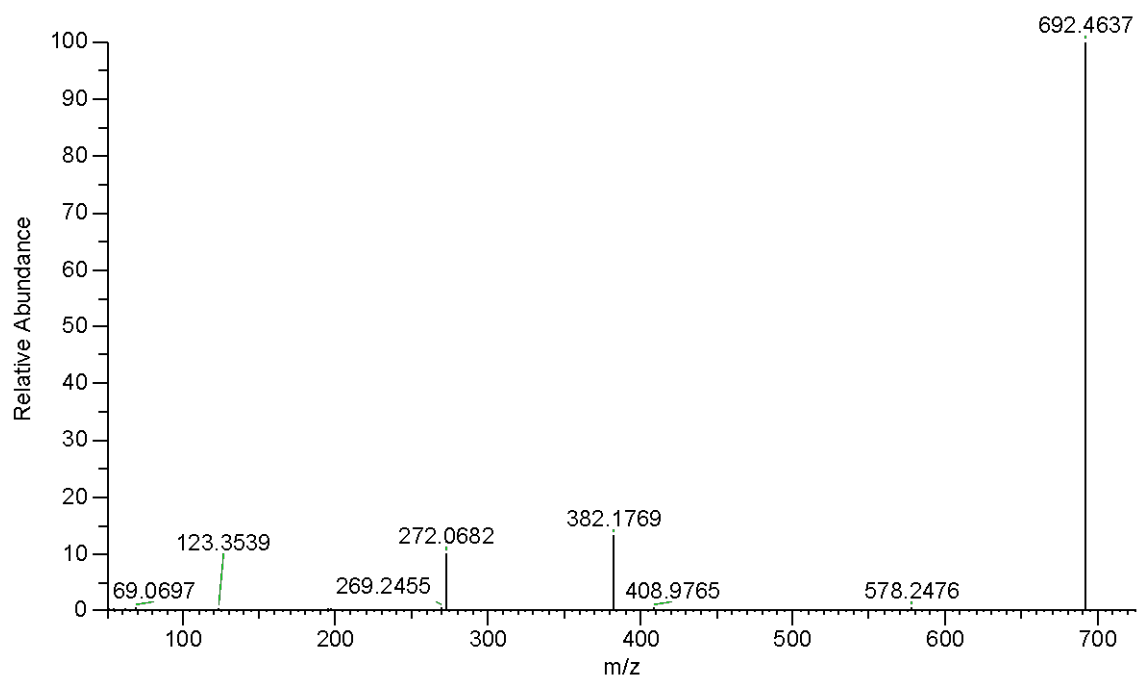

**Figure S15.** MS/MS spectrum of ion at  $m/z$  692.4654  $[(5+Na)^+]$

OC3\_A #4530 RT: 16.50 AV: 1 NL: 8.16E+005  
T: FTMS + c ESI d Full ms2 687.5099@hcd30.00 [50.0000-720.0000]

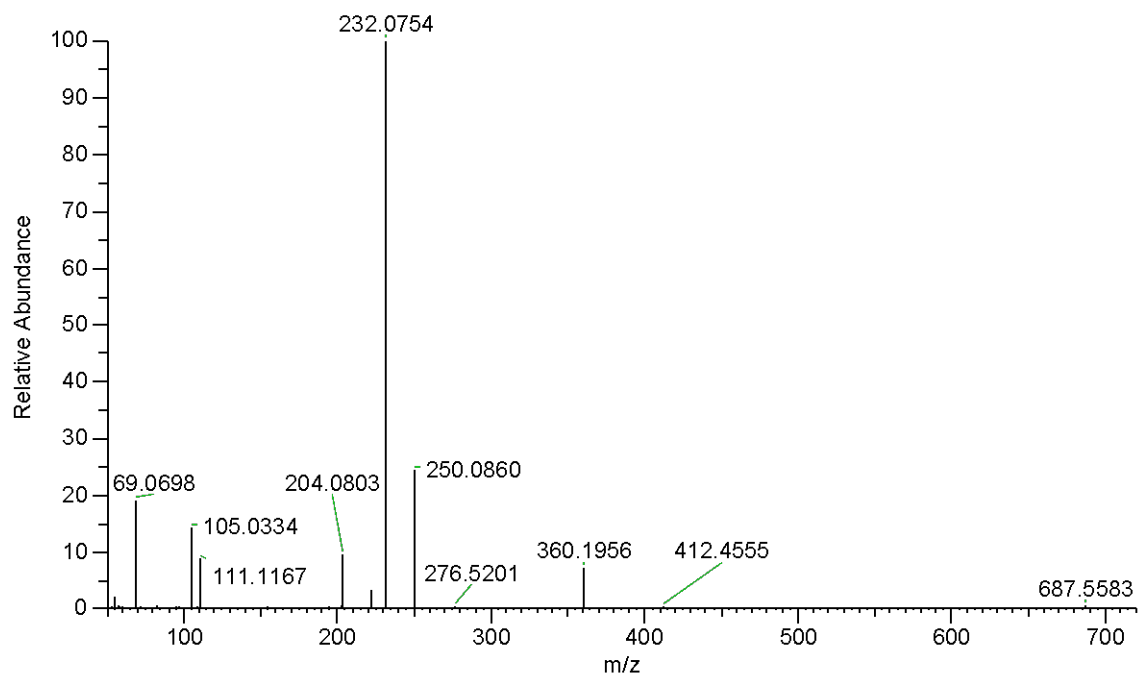

**Figure S16.** MS/MS spectrum of ion at  $m/z$  687.5099 [(5+NH<sub>4</sub>)<sup>+</sup>]

OC3\_A #4278-4290 RT: 15.65-15.69 AV: 6 SB: 10 15.55-15.61 NL: 1.65E+007  
T: FTMS + c ESI Full lock ms [133.4000-2000.0000]

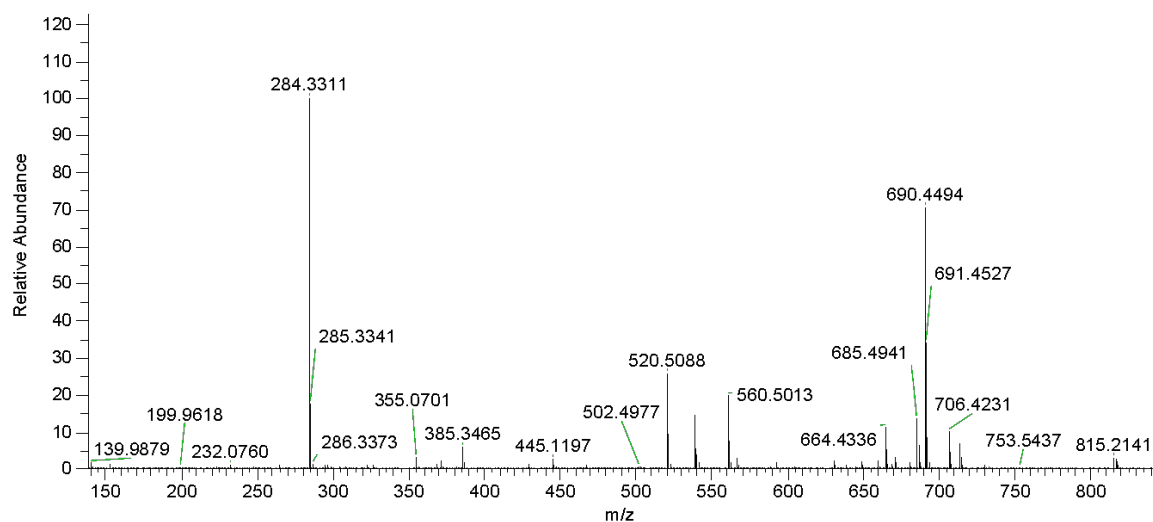

**Figure S17.** MS spectrum of compound **6**

OC3\_A #4278-4290 RT: 15.65-15.69 AV: 6 SB: 10 15.55-15.61 NL: 1.16E+007  
T: FTMS + c ESI Full lock ms [133.4000-2000.0000]

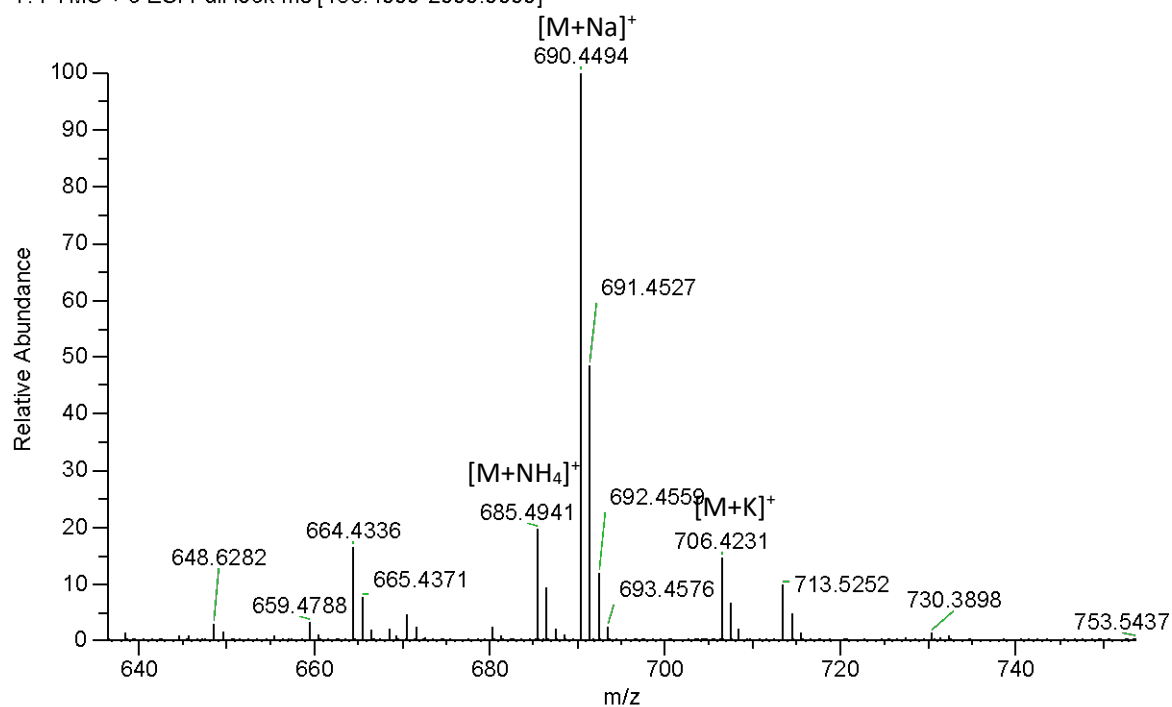

**Figure S18.** Expanded MS spectrum of compound 6

OC3\_A #4280 RT: 15.66 AV: 1 NL: 1.44E+006  
T: FTMS + c ESI d Full ms2 690.4494@hcd30.00 [50.0000-720.0000]

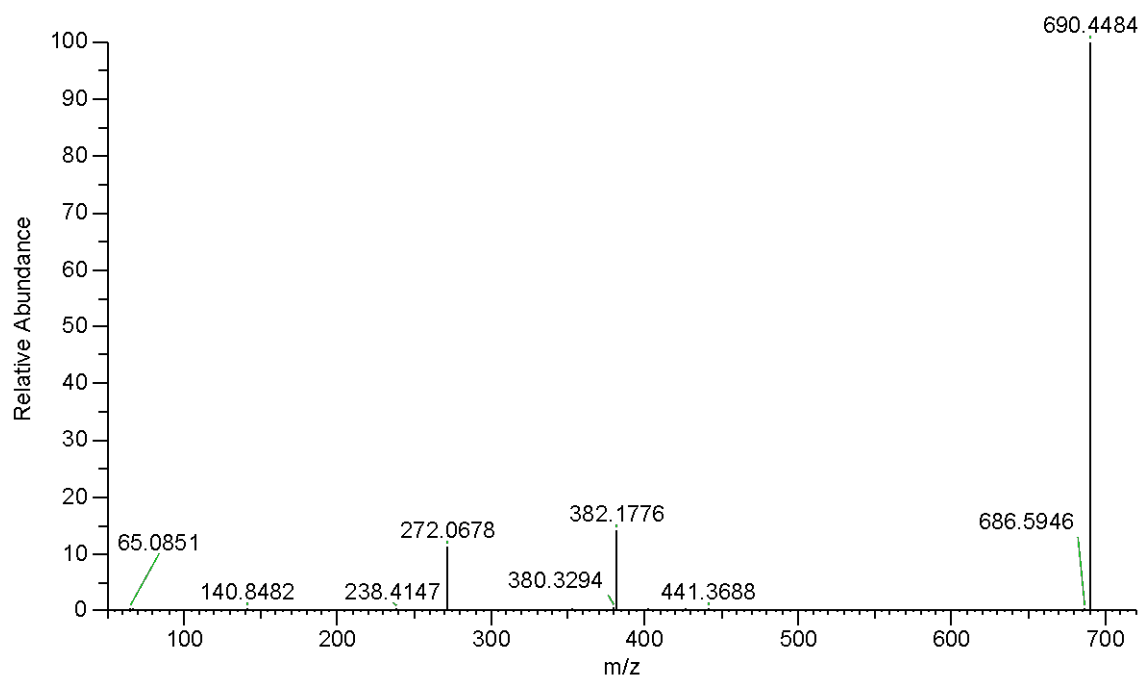

**Figure S19.** MS/MS spectrum of ion at  $m/z$  690.4498  $[(6+Na)^+]$

OC3\_A #4309-4321 RT: 15.75-15.79 AV: 7 SB: 3 15.71-15.73 NL: 5.71E+006  
T: FTMS + c ESI Full lock ms [133.4000-2000.0000]

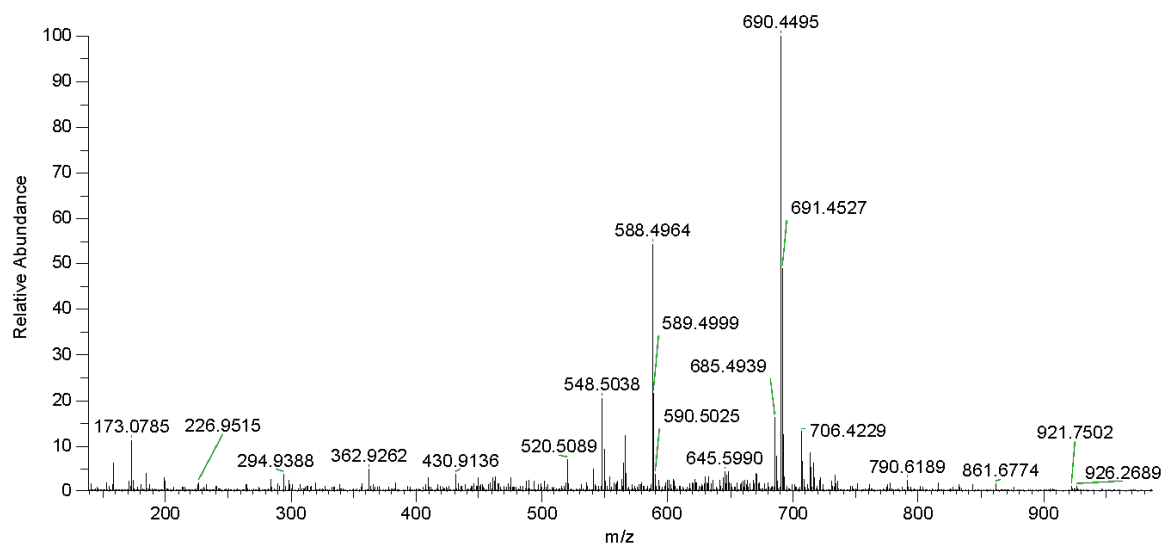

**Figure S20.** MS spectrum of compound 7

OC3\_A #4309-4321 RT: 15.75-15.79 AV: 7 SB: 3 15.71-15.73 NL: 5.71E+006  
T: FTMS + c ESI Full lock ms [133.4000-2000.0000]

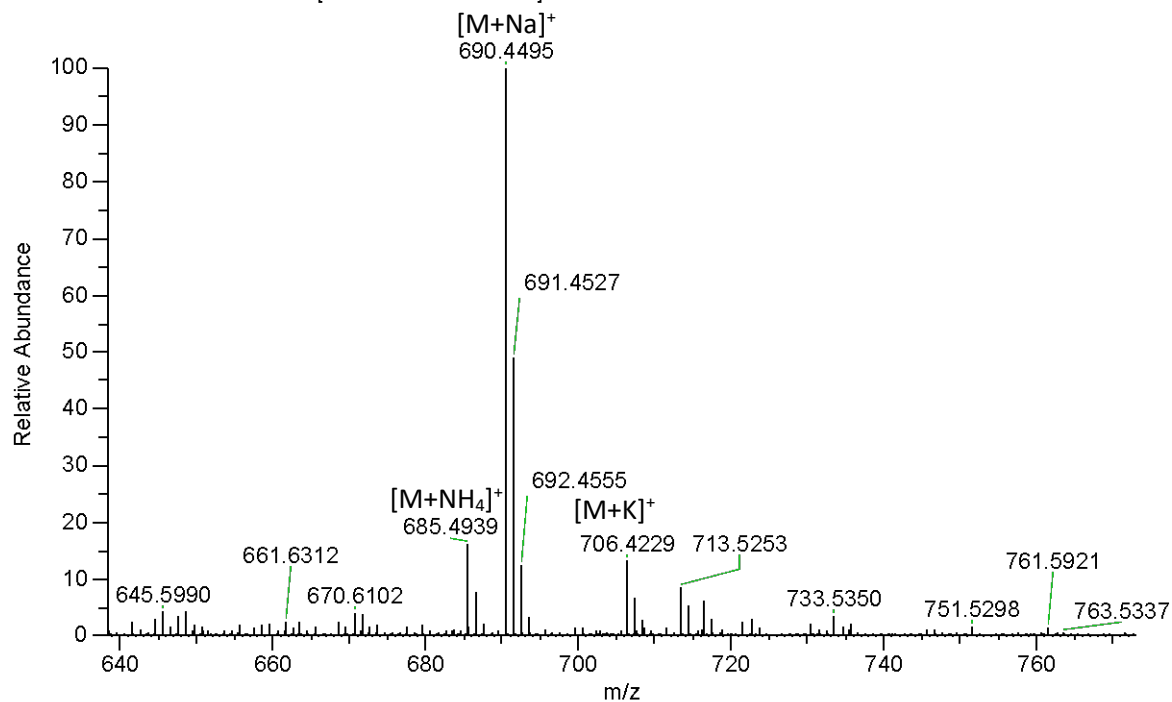

**Figure S21.** Expanded MS spectrum of compound 7

OC3\_A #4073-4091 RT: 14.96-15.02 AV: 10 SB: 19 14.76-14.89 NL: 1.67E+006  
T: FTMS + c ESI Full lock ms [133.4000-2000.0000]

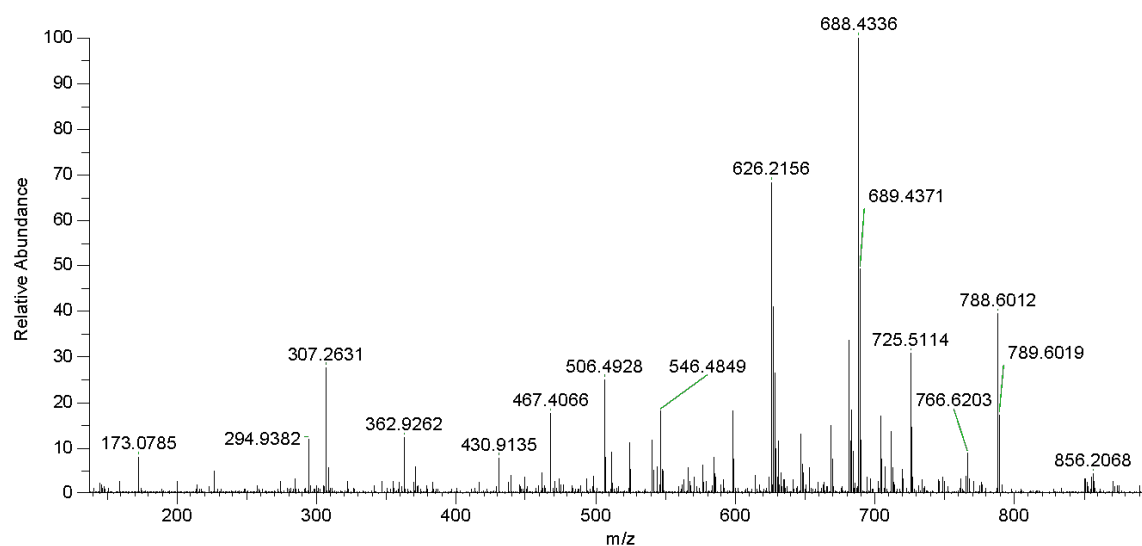

**Figure S22.** MS spectrum of compound **8**

OC3\_A #4073-4091 RT: 14.96-15.02 AV: 10 SB: 19 14.76-14.89 NL: 1.67E+006  
T: FTMS + c ESI Full lock ms [133.4000-2000.0000]

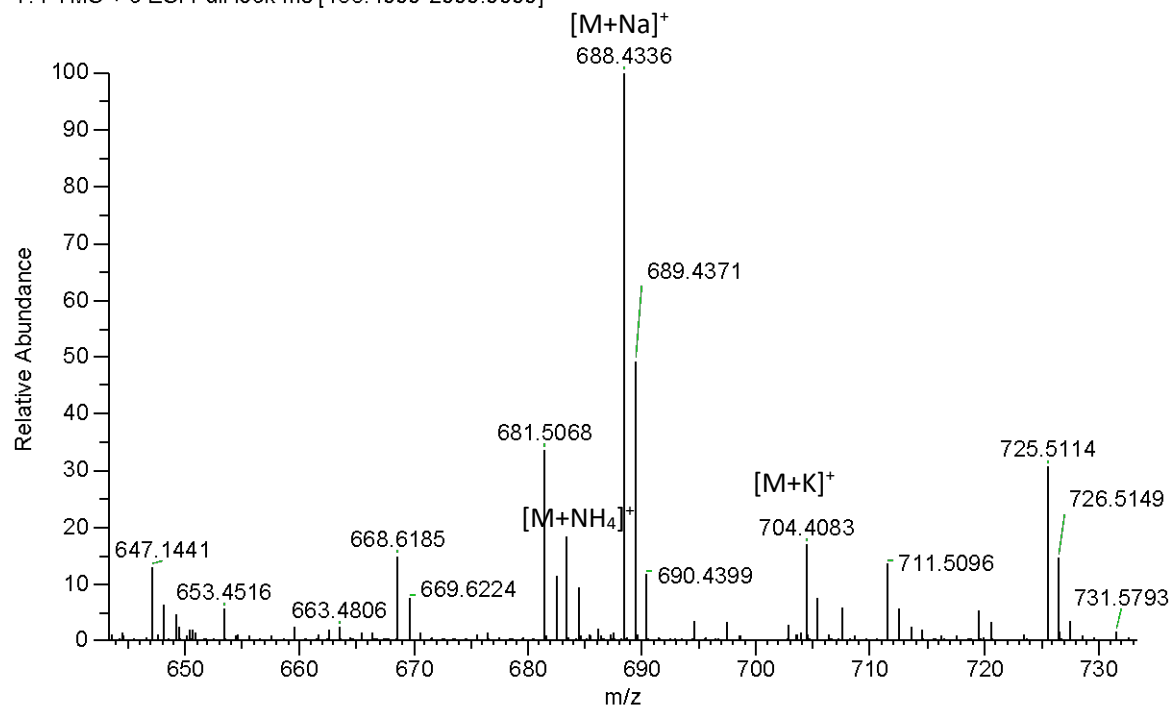

**Figure S23.** Expanded MS spectrum of compound **8**

OC3\_A #4086 RT: 15.00 AV: 1 NL: 2.00E+005  
T: FTMS + c ESI d Full ms2 688.4336@hcd30.00 [50.0000-720.0000]

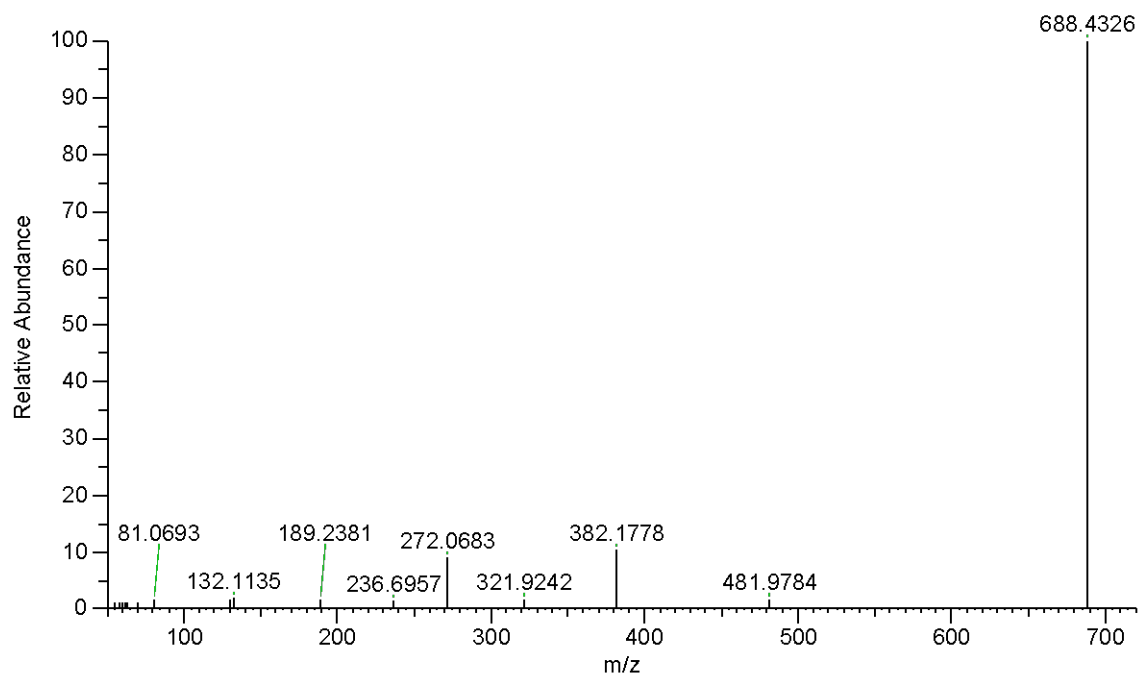

**Figure S24.** MS/MS spectrum of ion at  $m/z$  688.4336 [(8+Na)<sup>+</sup>]

OC3\_A #3688-3709 RT: 13.67-13.74 AV: 11 SB: 12 13.56-13.64 NL: 2.37E+006  
T: FTMS + c ESI Full lock ms [133.4000-2000.0000]

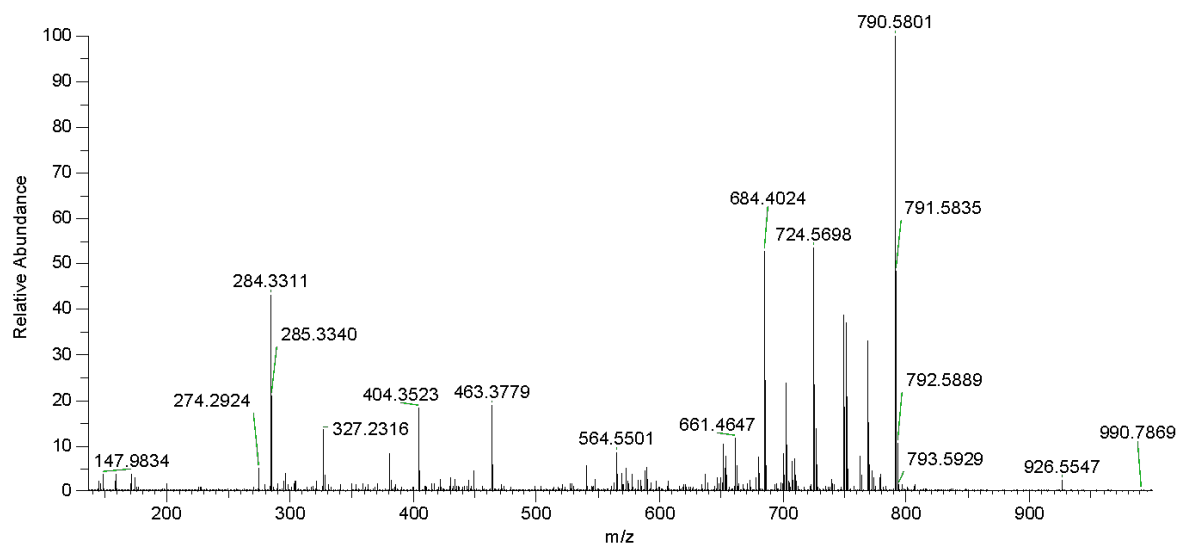

**Figure S25.** MS spectrum of compound **9**

OC3\_A #3688-3709 RT: 13.67-13.74 AV: 11 SB: 12 13.56-13.64 NL: 1.25E+006  
T: FTMS + c ESI Full lock ms [133.4000-2000.0000]

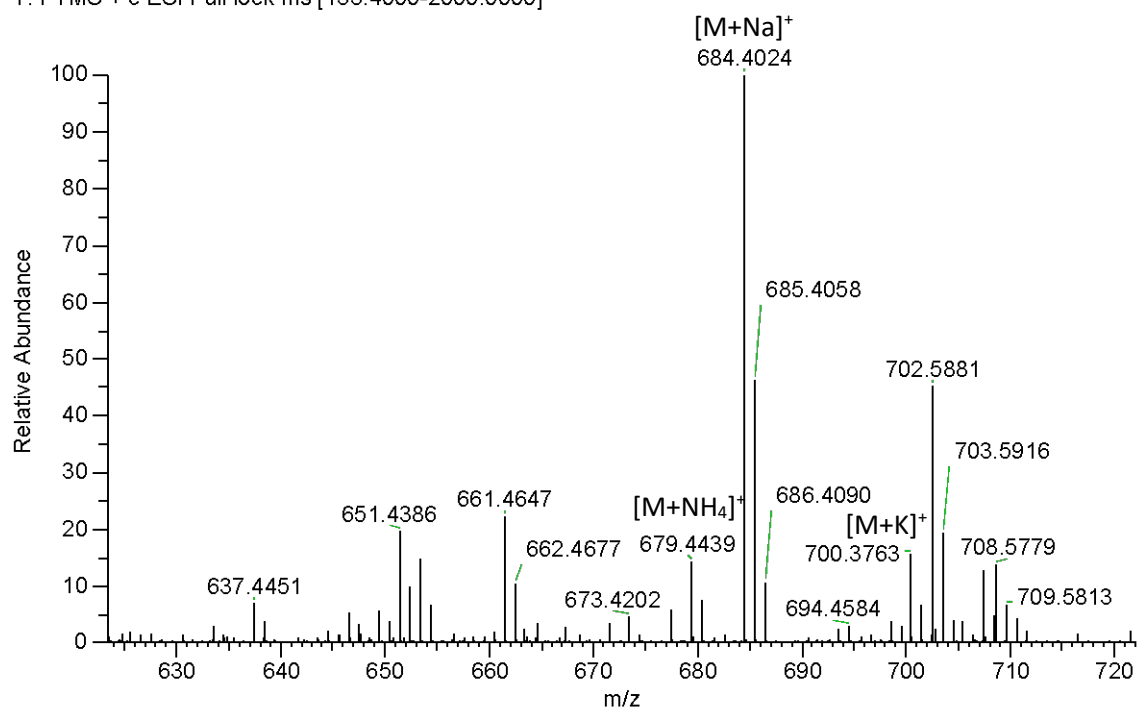

**Figure S26.** Expanded MS spectrum of compound **9**

OC3\_A #3700 RT: 13.71 AV: 1 NL: 2.20E+005  
T: FTMS + c ESI d Full ms2 684.4025@hcd30.00 [50.0000-715.0000]

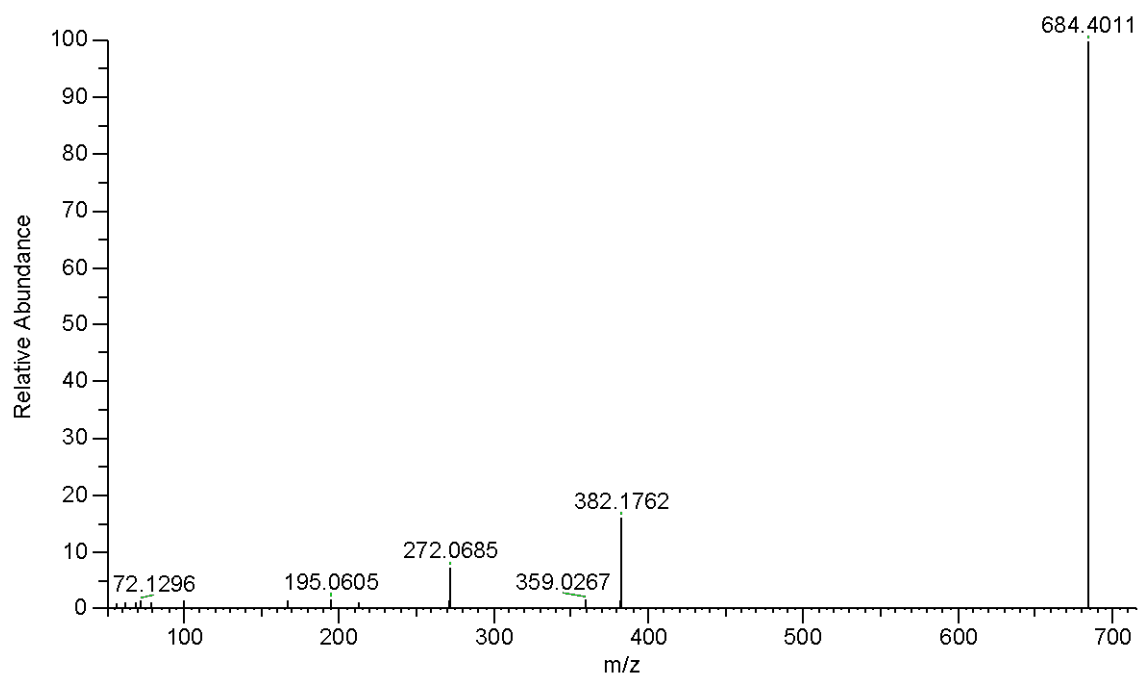

**Figure S27.** MS/MS spectrum of ion at  $m/z$  684.4023  $[(9+Na)^+]$



OC3\_A #4560-4578 RT: 16.6-16.66 AV: 9 SB: 31 16.36-16.56 NL: 2.39E+006  
T: FTMS + c ESI Full lock ms [133.4000-2000.0000]

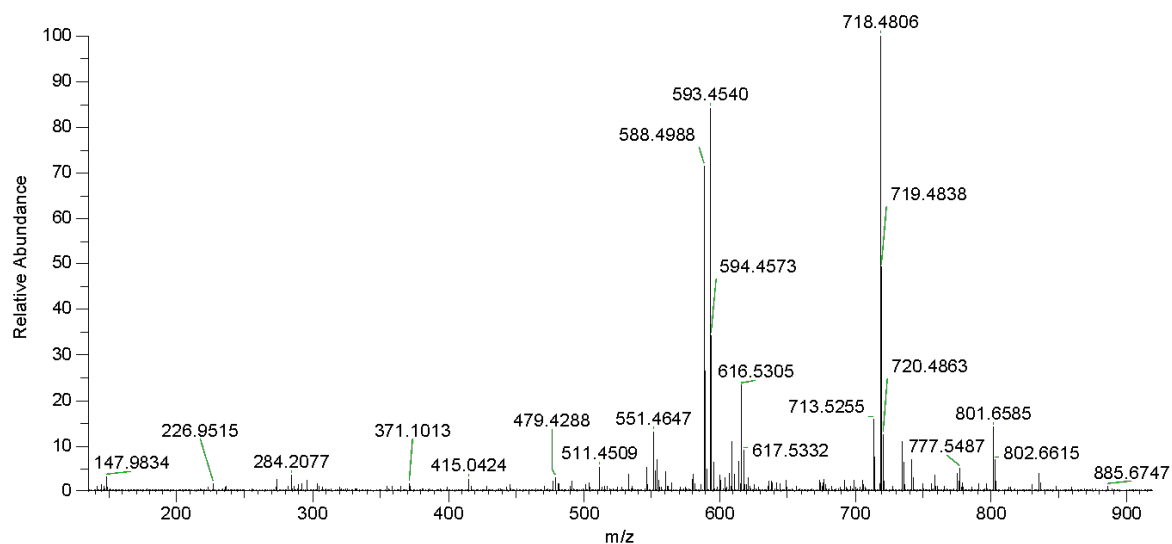

**Figure S28.** MS spectrum of compound **10**

OC3\_A #4560-4578 RT: 16.6-16.66 AV: 9 SB: 31 16.36-16.56 NL: 2.39E+006  
T: FTMS + c ESI Full lock ms [133.4000-2000.0000]

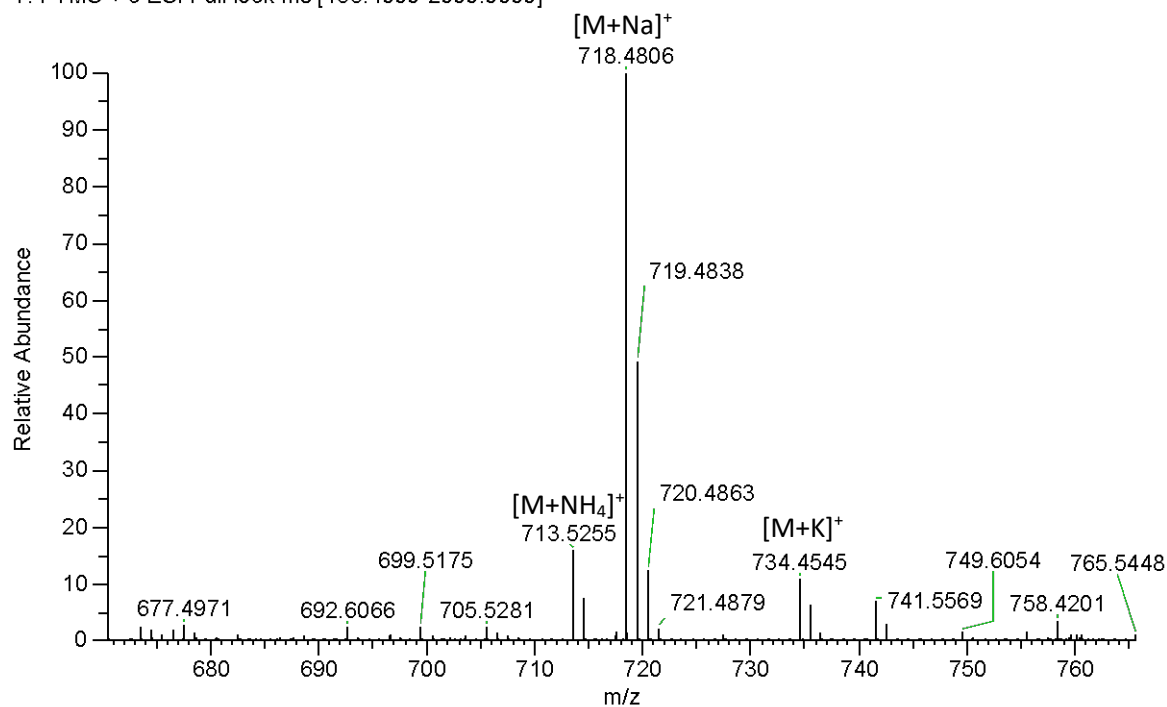

**Figure S29.** Expanded MS spectrum of compound **10**

OC3\_A #4570 RT: 16.63 AV: 1 NL: 4.19E+005  
T: FTMS + c ESI d Full ms2 718.4804@hcd30.00 [50.0000-750.0000]

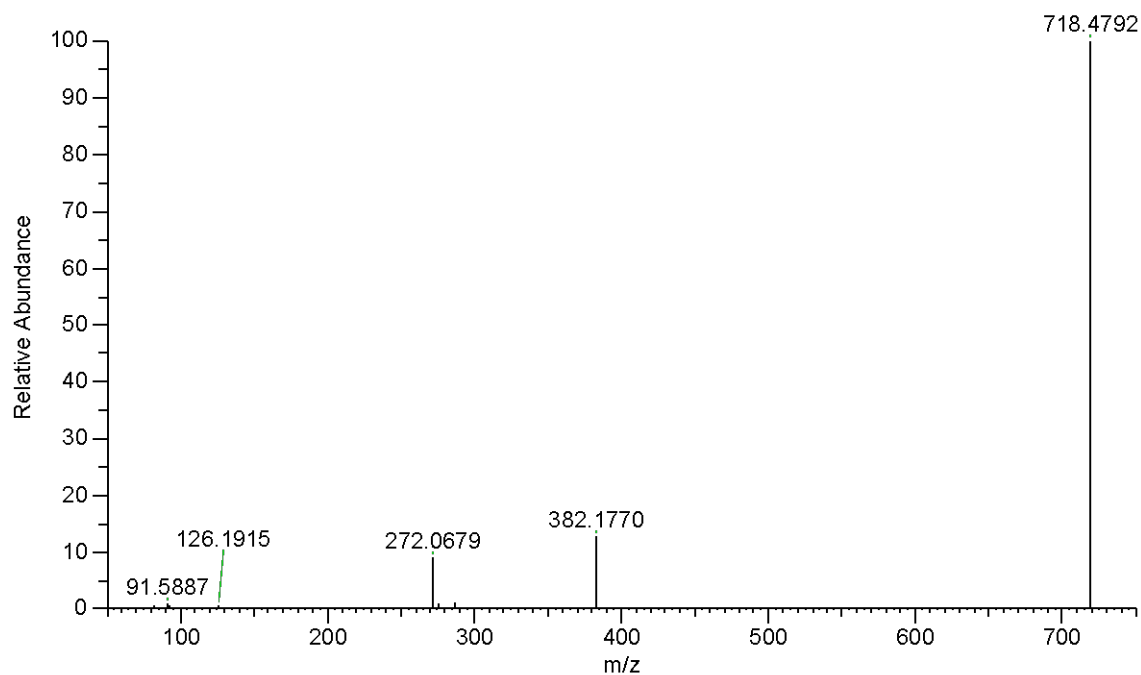

**Figure S30.** MS/MS spectrum of ion at  $m/z$  718.4811 [(10+Na)<sup>+</sup>]

OC3\_A #3792-3807 RT: 14.02-14.07 AV: 8 SB: 17 13.88-14.00 NL: 3.30E+007  
T: FTMS + c ESI Full lock ms [133.4000-2000.0000]

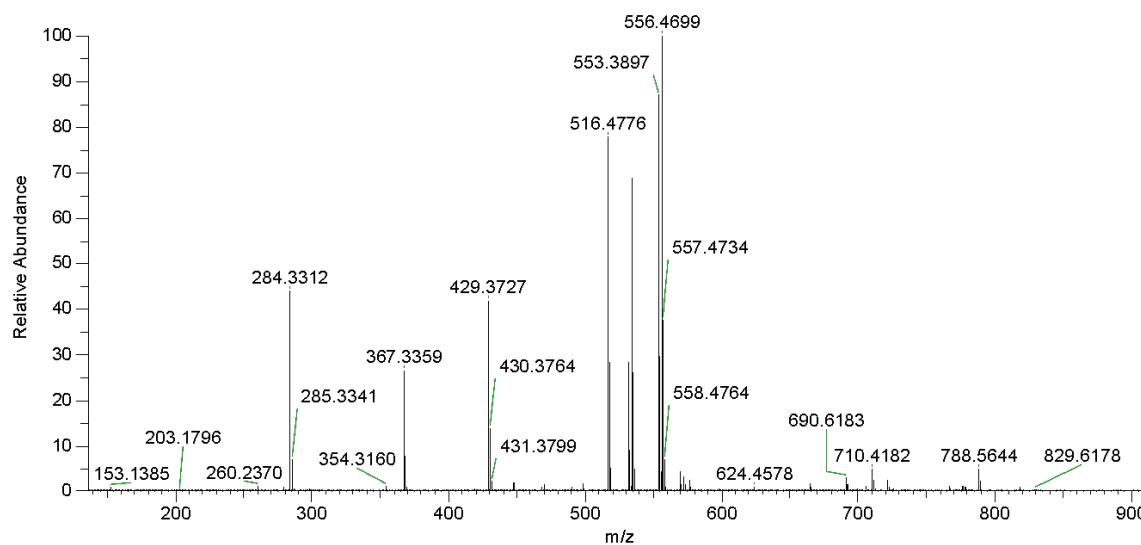

**Figure S31.** MS spectrum of compound **11**

OC3\_A #3792-3807 RT: 14.02-14.07 AV: 8 SB: 17 13.88-14.00 NL: 1.60E+006  
T: FTMS + c ESI Full lock ms [133.4000-2000.0000]

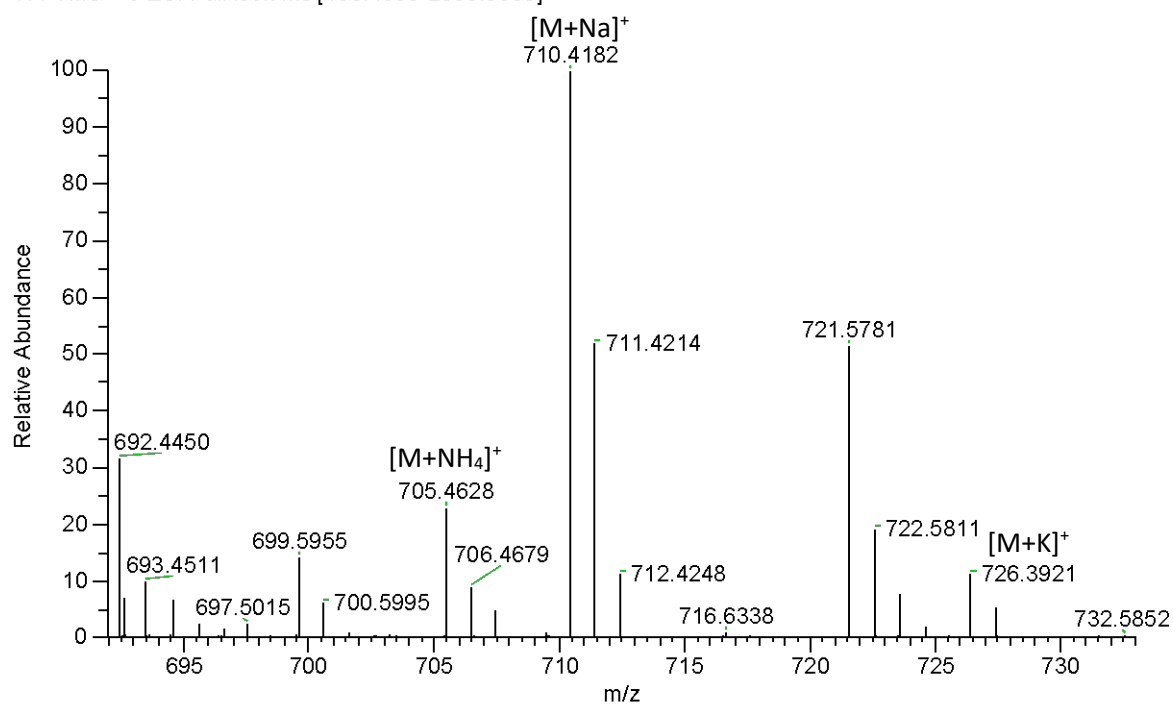

**Figure S32.** Expanded MS spectrum of compound **11**
