# Supplementary material for: Transfer of 7 Organic UV Filters from Sediment to the Ragworm Hediste diversicolor: Bioaccumulation of Benzophenone-3 and Further Proof of Octocrylene Metabolism
Source: MDPI journal article supplement (doi:10.3390/pollutants2010004), 2022-02-04
Supplement: s1 [file s1]

Archive with 1 entries (1 files):
- pollutants-1485215-supplementary.pdf
